# Supplementary material for: Novel approach to accurately predict bond strength and ligand lability in platinum-based anticancer drugs
Source: Royal Society of Chemistry journal article supplement (doi:10.1039/d0dt02552f), 2020-01-01
Supplement: d0dt02552f1.pdf [file d0dt02552f1.pdf]

## Supporting Information

# NOVEL APPROACH TO ACCURATELY PREDICT BOND STRENGTH AND LIGAND LABILITY IN PLATINUM-BASED ANTICANCER DRUGS

Miguel Ponce-Vargas,<sup>\*a</sup> Johanna Klein,<sup>a</sup> Eric Hénon<sup>a</sup>

<sup>a</sup>Institut de Chimie Moléculaire de Reims UMR CNRS 7312, Université de Reims Champagne-Ardenne, Moulin de la Housse 51687, Reims Cedex 02 BP39 (France)

email: miguel.ponce-vargas@univ-reims.fr

**Table S1.** Selected bond lengths (Å) obtained at M06-2X/LANL2TZ(f)/6-311++G\*\* level of theory for the native square-planar complexes (**I-R** and **II-R**) and the corresponding transition states (**I-TS** and **II-TS**).

**Table S2.** IBSI values and activation energies (kcal mol<sup>-1</sup>) at M06-2X/LANL2TZ(f)/6-311++G\*\* level of theory for the pre-reactive complexes (**I-PR** and **II-PR**) and the corresponding transition states (**I-TS** and **II-TS**).

**Table S3.** IBSI values of the Pt-L bonds in the constrained reactant geometries with a fixed Pt-L distance of 2.085 Å for **I-R** and 2.057 Å for **II-R**.

**Table S4.** IBSI values of the Pt-L and T-Pt bonds in the constrained reactant geometries with fixed Pt-L/T-Pt bond distances of 2.085 Å/2.616 Å for **I-R**, and 2.057 Å/2.697 Å for **II-R**.

**Figure S1.** 0.3 a.u.  $\delta g^{pair}$  isosurfaces in [Pt(NH<sub>3</sub>)<sub>2</sub>(H<sub>2</sub>O)<sub>2</sub>T]<sup>n+</sup> (**I-PR**) pre-reactive complexes and the integrated IBSI values for the T-Pt and Pt-H<sub>2</sub>O coordinate bonds. BGR color code in the range  $-0.1 < \rho \times \text{sign}(\lambda_2) < 0.1$  a.u.

**Table S5.** Optimized geometries of the platinum-based anticancer drugs obtained at the M06-2X/LANL2TZ(f)/6-311++G\*\* level of theory.

**Table S1.** Selected bond lengths (Å) obtained at M06-2X/LANL2TZ(f)/6-311++G\*\* level of theory for the native square-planar complexes (**I-R** and **II-R**) and the corresponding transition states (**I-TS** and **II-TS**).

| Series I     |                          | T = H <sub>2</sub> O | T = F <sup>-</sup> | T = NH <sub>3</sub> | T = Cl <sup>-</sup> | T = Br <sup>-</sup> | T = I <sup>-</sup> | T = SO <sub>3</sub> <sup>2-</sup> | T = CH <sub>3</sub> <sup>-</sup> | T = CN <sup>-</sup> | T = CO | T = H <sup>-</sup> |
|--------------|--------------------------|----------------------|--------------------|---------------------|---------------------|---------------------|--------------------|-----------------------------------|----------------------------------|---------------------|--------|--------------------|
| <b>I-R</b>   | <b>Pt-H<sub>2</sub>O</b> | 2.085                | 2.112              | 2.128               | 2.148               | 2.161               | 2.186              | 2.275                             | 2.327                            | 2.205               | 2.145  | 2.328              |
|              | <b>T-Pt</b>              | 2.085                | 1.966              | 2.024               | 2.297               | 2.417               | 2.616              | 2.202                             | 1.989                            | 1.888               | 1.820  | 1.507              |
|              | <b>Pt-NH<sub>3</sub></b> | 2.057                | 2.051              | 2.060               | 2.051               | 2.063               | 2.062              | 2.074                             | 2.062                            | 2.068               | 2.069  | 2.061              |
|              |                          | 2.057                | 2.058              | 2.066               | 2.061               | 2.052               | 2.050              | 2.064                             | 2.072                            | 2.057               | 2.059  | 2.068              |
| <b>I-TS</b>  | <b>Pt-H<sub>2</sub>O</b> | 2.422                | 2.521              | 2.490               | 2.517               | 2.532               | 2.586              | 2.804                             | 3.127                            | 2.513               | 2.367  | 2.688              |
|              |                          | 2.474                | 2.509              | 2.493               | 2.523               | 2.513               | 2.528              | 2.799                             | 2.923                            | 2.519               | 2.425  | 2.696              |
|              | <b>T-Pt</b>              | 2.132                | 1.987              | 2.027               | 2.304               | 2.418               | 2.615              | 2.197                             | 1.984                            | 1.877               | 1.807  | 1.499              |
|              | <b>Pt-NH<sub>3</sub></b> | 2.057                | 2.053              | 2.059               | 2.049               | 2.053               | 2.060              | 2.080                             | 2.057                            | 2.059               | 2.057  | 2.068              |
| 2.048        |                          | 2.049                | 2.058              | 2.054               | 2.053               | 2.048               | 2.064              | 2.078                             | 2.058                            | 2.057               | 2.068  |                    |
| Series II    |                          | T = H <sub>2</sub> O | T = F <sup>-</sup> | T = NH <sub>3</sub> | T = Cl <sup>-</sup> | T = Br <sup>-</sup> | T = I <sup>-</sup> | T = SO <sub>3</sub> <sup>2-</sup> | T = CH <sub>3</sub> <sup>-</sup> | T = CN <sup>-</sup> | T = CO | T = H <sup>-</sup> |
| <b>II-R</b>  | <b>Pt-NH<sub>3</sub></b> | 2.004                | 2.032              | 2.057               | 2.042               | 2.052               | 2.061              | 2.170                             | 2.251                            | 2.147               | 2.114  | 2.266              |
|              | <b>T-Pt</b>              | 2.130                | 2.018              | 2.056               | 2.379               | 2.499               | 2.697              | 2.246                             | 2.003                            | 1.914               | 1.835  | 1.523              |
|              | <b>Pt-Cl</b>             | 2.349                | 2.361              | 2.356               | 2.363               | 2.366               | 2.363              | 2.370                             | 2.378                            | 2.363               | 2.350  | 2.372              |
|              |                          | 2.350                | 2.362              | 2.356               | 2.363               | 2.365               | 2.362              | 2.381                             | 2.383                            | 2.362               | 2.351  | 2.371              |
| <b>II-TS</b> | <b>Pt-NH<sub>3</sub></b> | 2.413                | 2.501              | 2.488               | 2.481               | 2.483               | 2.476              | 2.605                             | 2.783                            | 2.517               | 2.369  | 2.680              |
|              |                          | 2.410                | 2.501              | 2.487               | 2.481               | 2.483               | 2.476              | 2.611                             | 2.809                            | 2.517               | 2.369  | 2.680              |
|              | <b>T-Pt</b>              | 2.196                | 2.024              | 2.030               | 2.366               | 2.471               | 2.666              | 2.209                             | 1.986                            | 1.874               | 1.795  | 1.504              |
|              | <b>Pt-Cl</b>             | 2.350                | 2.365              | 2.357               | 2.361               | 2.364               | 2.363              | 2.389                             | 2.380                            | 2.365               | 2.351  | 2.379              |
| 2.350        |                          | 2.365                | 2.357              | 2.361               | 2.364               | 2.363               | 2.380              | 2.385                             | 2.365                            | 2.351               | 2.379  |                    |

**Table S2.** IBSI values and activation energies (kcal mol<sup>-1</sup>) at M06-2X/LANL2TZ(f)/6-311++G\*\* level of theory for the pre-reactive complexes (**I-PR** and **II-PR**).

| Series I                                    |                   | T = H <sub>2</sub> O | T = F <sup>-</sup> | T = NH <sub>3</sub> | T = Cl <sup>-</sup> | T = Br <sup>-</sup> | T = I <sup>-</sup> | T = SO <sub>3</sub> <sup>2-</sup> | T = CH <sub>3</sub> <sup>-</sup> | T = CN <sup>-</sup> | T = CO        | T = H <sup>-</sup> |
|---------------------------------------------|-------------------|----------------------|--------------------|---------------------|---------------------|---------------------|--------------------|-----------------------------------|----------------------------------|---------------------|---------------|--------------------|
| <b>Pt</b> <sup>IBSI</sup> -H <sub>2</sub> O | <b>I-PR</b>       | 0.306                | 0.277              | 0.253               | 0.243               | 0.232               | 0.212              | 0.164                             | 0.141                            | 0.204               | 0.242         | 0.141              |
|                                             | IBSI <sup>σ</sup> | -0.207               | -0.191             | -0.166              | -0.159              | -0.150              | -0.138             | -0.120                            | -0.117                           | -0.122              | -0.130        | -0.090             |
| <b>T</b> <sup>IBSI</sup> -Pt                | <b>I-PR</b>       | 0.274                | 0.356              | 0.384               | 0.296               | 0.275               | 0.211              | 0.464                             | 0.474                            | 0.540               | 0.679         | 0.533              |
|                                             | IBSI <sup>π</sup> | -0.032               | -0.009             | 0.004               | 0.005               | 0.001               | -0.001             | -0.002                            | 0.006                            | 0.023               | 0.037         | 0.001              |
| <b>IBSI</b> <sup>trans</sup>                |                   | <b>-0.239</b>        | <b>-0.200</b>      | <b>-0.162</b>       | <b>-0.154</b>       | <b>-0.149</b>       | <b>-0.139</b>      | <b>-0.122</b>                     | <b>-0.111</b>                    | <b>-0.099</b>       | <b>-0.093</b> | <b>-0.089</b>      |
| Activation energy (ΔG <sup>‡</sup> )        |                   | 16.6                 | 17.4               | 15.9                | 13.6                | 12.1                | 11.8               | 9.5                               | 6.7                              | 12.4                | 11.6          | 7.8                |
| Series II                                   |                   | T = H <sub>2</sub> O | T = F <sup>-</sup> | T = NH <sub>3</sub> | T = Cl <sup>-</sup> | T = Br <sup>-</sup> | T = I <sup>-</sup> | T = SO <sub>3</sub> <sup>2-</sup> | T = CH <sub>3</sub> <sup>-</sup> | T = CN <sup>-</sup> | T = CO        | T = H <sup>-</sup> |
| <b>Pt</b> <sup>IBSI</sup> -NH <sub>3</sub>  | <b>II-PR</b>      | 0.423                | 0.390              | 0.359               | 0.372               | 0.365               | 0.348              | 0.256                             | 0.200                            | 0.284               | 0.319         | 0.197              |
|                                             | IBSI <sup>σ</sup> | -0.297               | -0.290             | -0.257              | -0.267              | -0.260              | -0.245             | -0.183                            | -0.151                           | -0.188              | -0.177        | -0.135             |
| <b>T</b> <sup>IBSI</sup> -Pt                | <b>II-PR</b>      | 0.228                | 0.300              | 0.334               | 0.238               | 0.220               | 0.186              | 0.416                             | 0.451                            | 0.492               | 0.635         | 0.513              |
|                                             | IBSI <sup>π</sup> | -0.028               | 0.010              | 0.046               | 0.017               | 0.021               | 0.012              | 0.062                             | 0.031                            | 0.073               | 0.104         | 0.030              |
| <b>IBSI</b> <sup>trans</sup>                |                   | <b>-0.325</b>        | <b>-0.280</b>      | <b>-0.211</b>       | <b>-0.250</b>       | <b>-0.239</b>       | <b>-0.233</b>      | <b>-0.121</b>                     | <b>-0.120</b>                    | <b>-0.115</b>       | <b>-0.073</b> | <b>-0.105</b>      |
| Activation energy (ΔG <sup>‡</sup> )        |                   | 13.2                 | 27.0               | 23.9                | 24.1                | 22.2                | 20.7               | 14.6                              | 13.2                             | 15.0                | 11.8          | 13.1               |

To clearly establish the electronic effects captured by IBSI without considering the influence of the bond distance we followed the methodology proposed by De Proft and coworkers<sup>34</sup>. Thus, to eliminate the distance effects we take the frozen Pt(NH<sub>3</sub>)<sub>2</sub>H<sub>2</sub>O part of the [Pt(NH<sub>3</sub>)<sub>2</sub>(H<sub>2</sub>O)<sub>2</sub>]<sup>2+</sup> complex and we complete it with the *trans* ligands T keeping the Pt-T bond distances of their corresponding structures. Results demonstrate that electronic effects exerted by the T ligand are well recovered by IBSI, as the *trans*-effect trend is preserved.

For the halogenated series (T = F<sup>-</sup>, Cl<sup>-</sup>, Br<sup>-</sup> and I<sup>-</sup>) we also fix the T-Pt bond, and we calculate the IBSI value for the Pt-L and T-Pt bonds. We can observe the decrease of the IBSI associated to Pt-L in line with the increase of the T-Pt IBSI values as expected, revealing a too affluence role played by the bond distance in the halogenated series.

**Table S3.** IBSI values of the Pt-L bonds in the constrained reactant geometries with a fixed Pt-L distance of 2.085 Å for **I-R** and 2.057 Å for **II-R**.

|             |                          | T = H <sub>2</sub> O | T = F <sup>-</sup> | T = NH <sub>3</sub> | T = Cl <sup>-</sup> | T = Br <sup>-</sup> | T = I <sup>-</sup> | T = SO <sub>3</sub> <sup>2-</sup> | T = CH <sub>3</sub> <sup>-</sup> | T = CN <sup>-</sup> | T = CO | T = H <sup>-</sup> |
|-------------|--------------------------|----------------------|--------------------|---------------------|---------------------|---------------------|--------------------|-----------------------------------|----------------------------------|---------------------|--------|--------------------|
| <b>I-R</b>  | <b>Pt-H<sub>2</sub>O</b> | 0.279                | 0.274              | 0.265               | 0.259               | 0.258               | 0.248              | 0.237                             | 0.211                            | 0.252               | 0.262  | 0.232              |
| <b>II-R</b> | <b>Pt-NH<sub>3</sub></b> | 0.362                | 0.355              | 0.344               | 0.344               | 0.343               | 0.332              | 0.314                             | 0.305                            | 0.330               | 0.337  | 0.306              |

**Table S4.** IBSI values of the Pt-L and T-Pt bonds in the constrained reactant geometries with fixed Pt-L/T-Pt bond distances of 2.085 Å/2.616 Å for **I-R**, and 2.057 Å/2.697 Å for **II-R**.

|             |                          | T = F <sup>-</sup> | T = Cl <sup>-</sup> | T = Br <sup>-</sup> | T = I <sup>-</sup> |
|-------------|--------------------------|--------------------|---------------------|---------------------|--------------------|
| <b>I-R</b>  | <b>Pt-H<sub>2</sub>O</b> | 0.280              | 0.268               | 0.264               | 0.248              |
|             | <b>T-Pt</b>              | 0.092              | 0.160               | 0.190               | 0.214              |
| <b>II-R</b> | <b>Pt-NH<sub>3</sub></b> | 0.371              | 0.357               | 0.352               | 0.332              |
|             | <b>T-Pt</b>              | 0.077              | 0.135               | 0.159               | 0.192              |

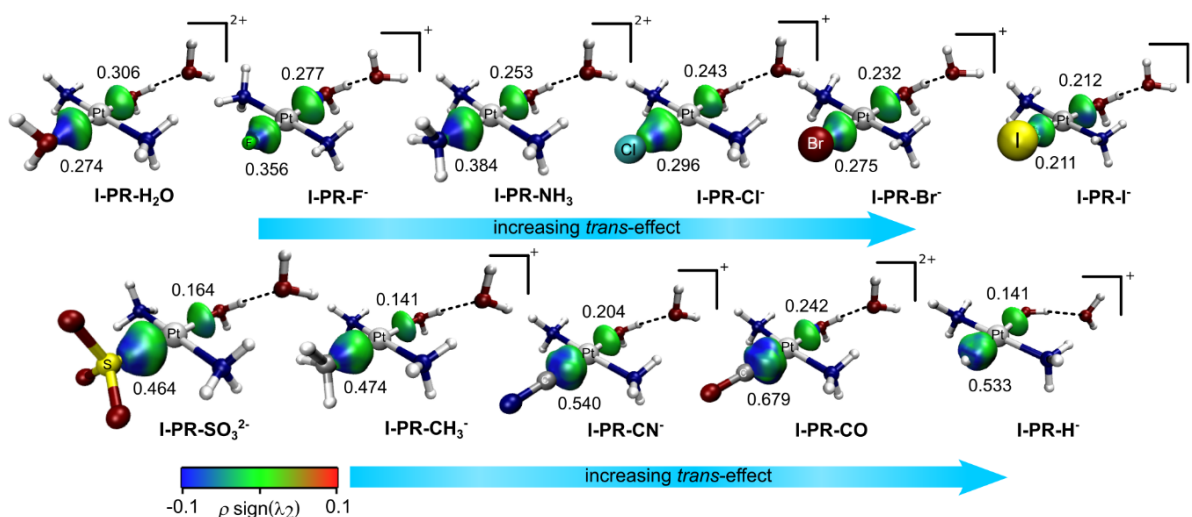

**Figure S1.** 0.3 a.u.  $\delta g^{pair}$  isosurfaces in  $[\text{Pt}(\text{NH}_3)_2(\text{H}_2\text{O})_2\text{T}]^{n+}$  (**I-PR**) pre-reactive complexes and the integrated IBSI values for the T-Pt and Pt-H<sub>2</sub>O coordinate bonds. BGR color code in the range  $-0.1 < \rho \times \text{sign}(\lambda_2) < 0.1$  a.u.

**Table S5.** Optimized geometries of the platinum-based anticancer drugs obtained at the M06-2X/LANL2TZ(f)/6-311++G\*\* level of theory.

### 1. Cisplatin

|    |           |           |           |
|----|-----------|-----------|-----------|
| Pt | 0.048548  | 0.068813  | -0.169693 |
| N  | 0.417089  | 1.539848  | 1.220271  |
| H  | -0.019708 | 2.429026  | 0.984782  |
| H  | 1.411409  | 1.714944  | 1.352788  |
| H  | 0.039621  | 1.249185  | 2.121697  |
| N  | 0.908781  | 1.183948  | -1.669043 |
| H  | 0.443396  | 2.076554  | -1.821088 |
| H  | 0.855779  | 0.663681  | -2.544313 |
| H  | 1.893081  | 1.379243  | -1.495773 |
| Cl | -0.935470 | -1.185708 | 1.579249  |
| Cl | -0.358594 | -1.605116 | -1.793930 |

### 2. *cis*- $[\text{PtCl}(\text{H}_2\text{O})(\text{NH}_3)_2]^+$

|    |           |           |           |
|----|-----------|-----------|-----------|
| Pt | -0.001273 | 0.000333  | -0.005948 |
| N  | 0.419836  | 1.396138  | 1.385859  |
| H  | 0.042234  | 2.312761  | 1.148373  |
| H  | 1.421023  | 1.507715  | 1.540180  |
| H  | 0.006632  | 1.123929  | 2.278456  |
| N  | 0.913907  | 1.080366  | -1.502209 |
| H  | 0.429586  | 1.952307  | -1.708107 |
| H  | 0.915340  | 0.534206  | -2.363120 |
| H  | 1.884087  | 1.312384  | -1.297749 |
| Cl | -1.059321 | -1.278816 | 1.657723  |
| O  | -0.455838 | -1.445262 | -1.508908 |
| H  | -1.396223 | -1.665758 | -1.540744 |
| H  | 0.017371  | -2.286503 | -1.374146 |

### 3. *cis*-[Pt (H<sub>2</sub>O)<sub>2</sub>(NH<sub>3</sub>)<sub>2</sub>]<sup>2+</sup>

|    |           |           |           |
|----|-----------|-----------|-----------|
| Pt | 0.039338  | 0.096029  | -0.006363 |
| N  | 0.442530  | 1.490822  | 1.391030  |
| H  | -0.005168 | 2.384032  | 1.186545  |
| H  | 1.439143  | 1.667934  | 1.510530  |
| H  | 0.083247  | 1.179909  | 2.294495  |
| N  | 0.937695  | 1.133783  | -1.479849 |
| H  | 0.483118  | 2.028010  | -1.662196 |
| H  | 0.892901  | 0.597107  | -2.347278 |
| H  | 1.922744  | 1.320810  | -1.296605 |
| O  | -0.900638 | -0.996018 | 1.561730  |
| H  | -1.843377 | -1.177399 | 1.453565  |
| H  | -0.471440 | -1.826021 | 1.807552  |
| O  | -0.400966 | -1.357938 | -1.495037 |
| H  | -1.336870 | -1.547109 | -1.641477 |
| H  | 0.051681  | -2.205194 | -1.388583 |

### 4. *cis*-[PtI<sub>2</sub>(NH<sub>3</sub>)<sub>2</sub>]

|    |           |           |           |
|----|-----------|-----------|-----------|
| Pt | 0.087052  | -0.031356 | -0.014607 |
| N  | 0.599290  | 1.468181  | 1.334357  |
| H  | 0.276553  | 2.389600  | 1.045253  |
| H  | 1.608834  | 1.522085  | 1.457618  |
| H  | 0.196312  | 1.280593  | 2.250958  |
| N  | 0.811671  | 1.152510  | -1.564422 |
| H  | 0.125309  | 1.856766  | -1.830123 |
| H  | 0.995721  | 0.589503  | -2.392968 |
| H  | 1.673872  | 1.641144  | -1.330973 |
| I  | -0.853659 | -1.472166 | 2.046203  |
| I  | -0.506940 | -1.920612 | -1.833370 |

### 5. Carboplatin

|    |           |           |           |
|----|-----------|-----------|-----------|
| Pt | 0.577647  | -0.009717 | 0.066232  |
| N  | 0.550612  | 1.667788  | 1.242678  |
| H  | -0.277093 | 2.244898  | 1.107440  |
| H  | 1.361924  | 2.268502  | 1.109827  |
| H  | 0.553689  | 1.373225  | 2.219139  |
| N  | 0.584619  | 1.022428  | -1.703443 |
| H  | -0.238262 | 1.606060  | -1.840429 |
| H  | 0.599890  | 0.343567  | -2.464578 |
| H  | 1.400765  | 1.619977  | -1.820815 |
| O  | 0.640960  | -1.083603 | 1.787284  |
| O  | 0.661263  | -1.701337 | -1.055349 |
| C  | 0.184065  | -2.836560 | -0.645194 |
| O  | 0.323069  | -3.868657 | -1.285453 |
| C  | 0.200134  | -2.303197 | 1.851385  |
| O  | 0.383835  | -3.009692 | 2.832679  |
| C  | -0.617578 | -2.828094 | 0.667658  |
| C  | -1.394915 | -4.136827 | 0.899967  |
| H  | -0.963992 | -5.036656 | 0.466313  |
| H  | -1.569596 | -4.278349 | 1.965898  |
| C  | -1.994432 | -2.114501 | 0.434898  |
| H  | -2.349434 | -1.654917 | 1.359436  |
| H  | -2.038731 | -1.382481 | -0.371625 |
| C  | -2.618442 | -3.507582 | 0.197021  |
| H  | -3.598949 | -3.693065 | 0.633609  |
| H  | -2.642711 | -3.754039 | -0.865173 |

## 6. *cis*-diammine(pyridine)-chloroplatinum

|    |           |           |           |
|----|-----------|-----------|-----------|
| Pt | -0.060285 | -0.034570 | -0.075812 |
| N  | -0.774134 | -1.277403 | -1.563628 |
| H  | -1.778022 | -1.439032 | -1.504928 |
| H  | -0.321472 | -2.189958 | -1.566183 |
| H  | -0.592710 | -0.854615 | -2.473481 |
| N  | -0.774823 | -1.315034 | 1.381003  |
| H  | -1.789971 | -1.276029 | 1.459405  |
| H  | -0.397859 | -1.098088 | 2.302517  |
| H  | -0.527821 | -2.285472 | 1.194555  |
| Cl | 0.769318  | 1.392160  | -1.755929 |
| C  | 1.605494  | 2.958052  | 3.291048  |
| C  | 0.252999  | 2.646765  | 3.232297  |
| C  | -0.191165 | 1.772971  | 2.254802  |
| N  | 0.646779  | 1.215758  | 1.363889  |
| C  | 1.955291  | 1.517099  | 1.415549  |
| C  | 2.468147  | 2.382851  | 2.366358  |
| H  | 1.980622  | 3.639664  | 4.044094  |
| H  | -0.458518 | 3.071759  | 3.926833  |
| H  | -1.237156 | 1.508957  | 2.163957  |
| H  | 2.581287  | 1.050238  | 0.667311  |
| H  | 3.528017  | 2.597212  | 2.371082  |

## 7. [(NHC)Cl<sub>2</sub>Pt]<sup>2-</sup>

|    |           |           |           |
|----|-----------|-----------|-----------|
| Pt | -1.995242 | -0.791610 | -1.685027 |
| Cl | -3.534962 | -0.816619 | 0.282378  |
| Cl | -3.582038 | -2.252551 | -2.949922 |
| N  | 0.198925  | 2.053340  | 0.418373  |
| C  | 1.166736  | 1.448607  | -0.264065 |
| C  | -1.014961 | 1.441372  | 0.136099  |
| C  | -0.797336 | 0.423133  | -0.748881 |
| N  | 0.583064  | 0.465822  | -0.971196 |
| N  | 0.242432  | -0.706262 | -5.200214 |
| C  | 1.198119  | -0.538968 | -4.290870 |
| C  | -0.982173 | -0.843713 | -4.560774 |
| C  | -0.785049 | -0.761056 | -3.210987 |
| N  | 0.596262  | -0.567219 | -3.089500 |
| H  | -1.888692 | -0.994575 | -5.120087 |
| H  | -1.928779 | 1.781417  | 0.590710  |
| C  | 1.262510  | -0.506996 | -1.802927 |
| H  | 2.304367  | -0.225142 | -1.932010 |
| H  | 1.200279  | -1.485172 | -1.325819 |
| C  | 2.651332  | -0.371310 | -4.547237 |
| H  | 3.216887  | -1.200337 | -4.117825 |
| H  | 2.842181  | -0.345182 | -5.617795 |
| H  | 3.011717  | 0.563204  | -4.113101 |
| C  | 2.614051  | 1.779679  | -0.238101 |
| H  | 2.781004  | 2.679368  | 0.350142  |
| H  | 3.188134  | 0.965120  | 0.207395  |
| H  | 2.983734  | 1.958666  | -1.249263 |
| C  | 0.375882  | 3.191917  | 1.319038  |
| H  | -0.595329 | 3.433647  | 1.741738  |
| H  | 1.063070  | 2.929591  | 2.121293  |
| H  | 0.752088  | 4.050612  | 0.765485  |
| C  | 0.441781  | -0.742023 | -6.648653 |
| H  | 1.100837  | -1.566822 | -6.914143 |
| H  | -0.528783 | -0.893233 | -7.112844 |
| H  | 0.861566  | 0.202118  | -6.991345 |

8. [(NHC)Br<sub>2</sub>Pt]<sup>2-</sup>

|    |           |           |           |
|----|-----------|-----------|-----------|
| Pt | -2.455625 | -0.803465 | -1.581403 |
| Br | -4.127930 | -2.364421 | -2.889170 |
| Br | -4.079214 | -0.767859 | 0.496484  |
| N  | -0.198545 | 2.032713  | 0.482677  |
| C  | 0.755724  | 1.389193  | -0.183163 |
| C  | -1.427050 | 1.449329  | 0.204945  |
| C  | -1.233855 | 0.409166  | -0.660006 |
| N  | 0.148601  | 0.410251  | -0.875456 |
| N  | -0.212499 | -0.718946 | -5.099393 |
| C  | 0.745932  | -0.590647 | -4.186559 |
| C  | -1.440090 | -0.842148 | -4.463462 |
| C  | -1.242686 | -0.790384 | -3.112281 |
| N  | 0.142256  | -0.630081 | -2.986520 |
| H  | -2.348394 | -0.961906 | -5.027184 |
| H  | -2.332253 | 1.822427  | 0.650714  |
| C  | 0.803303  | -0.588159 | -1.696954 |
| H  | 1.854555  | -0.340853 | -1.820600 |
| H  | 0.705244  | -1.561600 | -1.216541 |
| C  | 2.202110  | -0.445296 | -4.439794 |
| H  | 2.754508  | -1.280202 | -4.005147 |
| H  | 2.395626  | -0.427421 | -5.510044 |
| H  | 2.574956  | 0.486241  | -4.009662 |
| C  | 2.211538  | 1.680410  | -0.154172 |
| H  | 2.402189  | 2.572902  | 0.437801  |
| H  | 2.762183  | 0.848980  | 0.289471  |
| H  | 2.587769  | 1.853117  | -1.163942 |
| C  | 0.005100  | 3.178469  | 1.368556  |
| H  | -0.962430 | 3.457264  | 1.776685  |
| H  | 0.674585  | 2.905848  | 2.182316  |
| H  | 0.414478  | 4.016523  | 0.807097  |
| C  | -0.013779 | -0.728046 | -6.548389 |
| H  | 0.636391  | -1.554306 | -6.830368 |
| H  | -0.985955 | -0.860175 | -7.015066 |
| H  | 0.415759  | 0.218371  | -6.872324 |

## 9. Lobaplatin

|    |           |           |           |
|----|-----------|-----------|-----------|
| Pt | -0.139399 | 0.059211  | -0.177369 |
| N  | 0.053489  | 1.486154  | 1.347243  |
| H  | -0.915235 | 1.756549  | 1.516625  |
| N  | 1.618884  | 0.330479  | -1.206198 |
| H  | 1.635457  | -0.489828 | -1.815147 |
| O  | -1.948660 | -0.446791 | 0.608231  |
| O  | -0.572159 | -1.344946 | -1.525185 |
| C  | -1.593221 | -2.176155 | -1.035572 |
| C  | -2.470970 | -1.486605 | 0.023966  |
| H  | 2.442693  | 0.249426  | -0.610790 |
| H  | 0.338367  | 0.997848  | 2.194569  |
| O  | -3.573675 | -1.932524 | 0.316090  |
| C  | -1.020425 | -3.451770 | -0.408205 |
| H  | -0.380623 | -3.188755 | 0.439389  |
| H  | -1.815377 | -4.115975 | -0.062989 |
| H  | -0.415011 | -3.977851 | -1.148295 |
| H  | -2.260202 | -2.455528 | -1.860642 |
| C  | 1.747514  | 1.556960  | -2.041592 |
| H  | 2.576379  | 1.426555  | -2.742913 |
| C  | 0.864418  | 2.731054  | 1.219983  |
| H  | 1.882014  | 2.503733  | 1.544364  |
| H  | 0.458191  | 3.482833  | 1.901797  |
| C  | 0.882120  | 3.254167  | -0.200220 |
| C  | 1.393778  | 4.689007  | -0.458723 |
| C  | 2.013769  | 4.171015  | -1.778741 |
| C  | 1.988224  | 2.757406  | -1.161237 |
| H  | -0.101478 | 3.122989  | -0.665411 |
| H  | 2.172359  | 4.959083  | 0.259295  |
| H  | 0.654521  | 5.487320  | -0.510612 |
| H  | 1.299812  | 4.247560  | -2.602280 |
| H  | 2.976965  | 4.571814  | -2.091484 |
| H  | 2.908209  | 2.607335  | -0.582308 |
| H  | 0.822775  | 1.667559  | -2.610805 |



## 9a. Protonated Lobaplatin

|    |           |           |           |
|----|-----------|-----------|-----------|
| Pt | 0.020230  | -0.002173 | 0.029282  |
| N  | 0.269661  | 1.377509  | 1.583594  |
| H  | -0.686847 | 1.592561  | 1.863790  |
| N  | 1.797579  | 0.243260  | -0.899667 |
| H  | 1.885164  | -0.606673 | -1.460396 |
| O  | -1.908018 | -0.551223 | 0.723545  |
| O  | -0.429014 | -1.356540 | -1.380746 |
| C  | -1.445261 | -2.211275 | -0.959382 |
| C  | -2.304359 | -1.534340 | 0.088309  |
| H  | 2.586291  | 0.232484  | -0.252513 |
| H  | 0.668799  | 0.884960  | 2.381076  |
| O  | -3.472337 | -2.069807 | 0.323800  |
| C  | -0.902188 | -3.506478 | -0.336308 |
| H  | -0.279007 | -3.265470 | 0.528243  |
| H  | -1.707020 | -4.177320 | -0.030995 |
| H  | -0.286209 | -4.006352 | -1.083598 |
| H  | -2.103514 | -2.465478 | -1.799379 |
| C  | 1.917462  | 1.431821  | -1.797784 |
| H  | 2.770607  | 1.279211  | -2.463409 |
| C  | 0.993409  | 2.677430  | 1.412808  |
| H  | 2.023182  | 2.534335  | 1.745583  |
| H  | 0.531460  | 3.415410  | 2.072389  |
| C  | 0.979166  | 3.157849  | -0.021737 |
| C  | 1.429152  | 4.603611  | -0.329774 |
| C  | 2.059742  | 4.067983  | -1.638078 |
| C  | 2.103339  | 2.678146  | -0.970064 |
| H  | -0.000485 | 2.973130  | -0.476376 |
| H  | 2.201750  | 4.928947  | 0.371391  |
| H  | 0.656290  | 5.367578  | -0.400744 |
| H  | 1.335160  | 4.083484  | -2.455522 |
| H  | 3.001206  | 4.499514  | -1.974338 |
| H  | 3.031539  | 2.594185  | -0.391247 |
| H  | 1.007815  | 1.483423  | -2.397914 |
| H  | -3.919652 | -1.599582 | 1.046600  |

## 10. Nedaplatin

|    |           |           |           |
|----|-----------|-----------|-----------|
| Pt | 0.022256  | 0.051048  | -0.016260 |
| N  | 0.240970  | 1.713585  | 1.166103  |
| H  | -0.141668 | 2.563036  | 0.755744  |
| N  | 1.133976  | 0.863626  | -1.577566 |
| H  | 1.202428  | 0.184628  | -2.333778 |
| O  | -1.059535 | -0.817952 | 1.413489  |
| O  | -0.295074 | -1.681145 | -1.027008 |
| C  | -1.015836 | -2.537118 | -0.364456 |
| O  | -1.318133 | -3.640464 | -0.802095 |
| C  | -1.486081 | -2.093336 | 1.024306  |
| H  | 2.087481  | 1.104111  | -1.314715 |
| H  | -0.264803 | 1.548787  | 2.035880  |
| H  | 0.714541  | 1.701405  | -1.975346 |
| H  | 1.207920  | 1.910124  | 1.416470  |
| H  | -1.133911 | -2.862473 | 1.725910  |
| H  | -2.583345 | -2.159587 | 1.007924  |

## 10a. Protonated Nedaplatin

|    |           |           |           |
|----|-----------|-----------|-----------|
| Pt | 0.019633  | -0.052268 | 0.001770  |
| N  | 0.234964  | 1.607723  | 1.127054  |
| H  | -0.166210 | 2.442702  | 0.703373  |
| N  | 1.068880  | 0.791405  | -1.578340 |
| H  | 1.141971  | 0.138198  | -2.356490 |
| O  | -0.981929 | -0.928673 | 1.498992  |
| O  | -0.346164 | -1.911945 | -0.934859 |
| C  | -1.062913 | -2.613526 | -0.213902 |
| O  | -1.443555 | -3.806869 | -0.584365 |
| C  | -1.563415 | -2.132140 | 1.122291  |
| H  | 2.022208  | 1.046442  | -1.326762 |
| H  | -0.250686 | 1.456238  | 2.011594  |
| H  | 0.622493  | 1.629388  | -1.946475 |
| H  | 1.207365  | 1.815151  | 1.349514  |
| H  | -1.368357 | -2.931774 | 1.848671  |
| H  | -2.657693 | -2.062850 | 1.012795  |
| H  | -1.098820 | -4.011969 | -1.468938 |

## 11. Heptaplatin

|    |           |           |           |
|----|-----------|-----------|-----------|
| Pt | -0.072246 | 0.024150  | -0.031848 |
| N  | -0.207982 | 1.666693  | 1.199072  |
| H  | -1.207597 | 1.875457  | 1.218305  |
| N  | 1.734105  | 0.407401  | -0.932235 |
| H  | 1.955810  | -0.485009 | -1.378133 |
| O  | -1.906736 | -0.414610 | 0.726391  |
| O  | -0.064087 | -1.625254 | -1.229090 |
| C  | -0.720721 | -2.699253 | -0.915758 |
| C  | -2.340884 | -1.634333 | 0.804809  |
| H  | 2.493437  | 0.573216  | -0.271319 |
| H  | 0.014492  | 1.356780  | 2.144618  |
| C  | -1.359934 | -2.760453 | 0.472806  |
| H  | -1.871946 | -3.711944 | 0.580265  |
| H  | -0.546599 | -2.705360 | 1.204573  |
| O  | -3.477472 | -1.904617 | 1.163476  |
| C  | 1.741824  | 1.458639  | -1.982790 |
| H  | 2.632264  | 1.347888  | -2.603932 |
| C  | 0.541578  | 2.917543  | 0.925758  |
| H  | 1.565027  | 2.789591  | 1.281130  |
| H  | 0.088266  | 3.734977  | 1.487290  |
| C  | 0.519252  | 3.267538  | -0.557408 |
| O  | 0.558004  | 4.682478  | -0.698468 |
| O  | 1.759567  | 3.793799  | -2.402380 |
| C  | 1.750641  | 2.837512  | -1.360805 |
| H  | -0.393210 | 2.874441  | -1.024691 |
| H  | 2.647971  | 2.964309  | -0.735471 |
| H  | 0.855337  | 1.329697  | -2.603946 |
| O  | -0.810369 | -3.657396 | -1.669034 |
| C  | 1.409432  | 5.019353  | -1.794973 |
| H  | 2.311010  | 5.496922  | -1.383700 |
| C  | 0.711616  | 5.928933  | -2.784944 |
| H  | -0.184291 | 5.393877  | -3.119110 |
| C  | 0.301898  | 7.228291  | -2.093140 |
| H  | -0.220615 | 7.880094  | -2.795785 |
| H  | -0.355709 | 7.037562  | -1.243993 |
| H  | 1.185480  | 7.763806  | -1.732136 |
| C  | 1.623729  | 6.201007  | -3.980197 |
| H  | 2.546070  | 6.690933  | -3.652824 |
| H  | 1.889769  | 5.279049  | -4.498673 |
| H  | 1.125623  | 6.865141  | -4.689133 |
